# Supplementary material for: Preparing for the crewed Mars journey: microbiota dynamics in the confined Mars500 habitat during simulated Mars flight and landing
Source: PubMed Central journal article supplement (PMC5627443; doi:10.1186/s40168-017-0345-8), 2017-10-04
Supplement: 40168_2017_345_MOESM8_ESM.pdf [file 40168_2017_345_MOESM8_ESM.pdf]

# Sampling event

06/10 07/10 11/10 03/11 07/11 10/11 04/12

Day 14 44 169 286 406 405 600

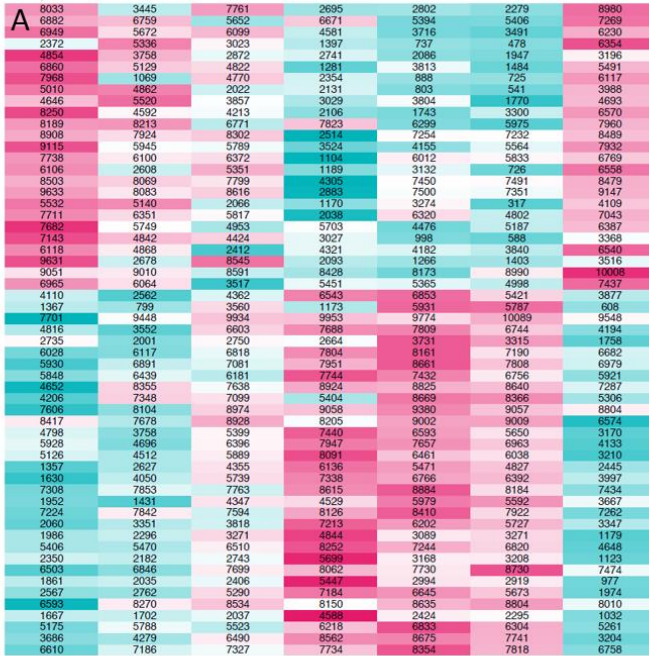

OTUs from habitable module EU-150

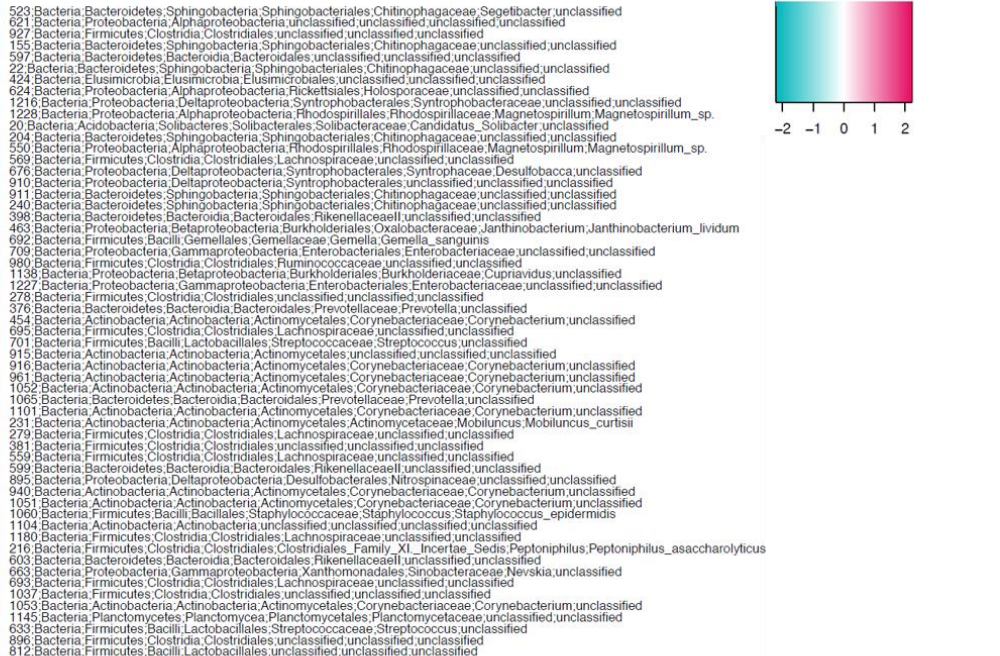

OTUs from utility module EU-250

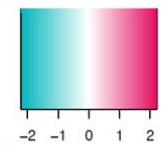

523;Bacteria;Bacteroidetes;Sphingobacteria;Sphingobacteriales;Chitinophagaceae;Segetibacter;unclassified  
 621;Bacteria;Proteobacteria;Alphaproteobacteria;unclassified;unclassified;unclassified;unclassified  
 927;Bacteria;Firmicutes;Clostridia;Clostridiales;unclassified;unclassified;unclassified;unclassified  
 155;Bacteria;Sphingobacteriales;Sphingobacteriales;Chitinophagaceae;unclassified;unclassified  
 597;Bacteria;Bacteroidetes;Bacteroidia;Bacteroidales;unclassified;unclassified;unclassified  
 22;Bacteria;Bacteroidetes;Sphingobacteria;Sphingobacteriales;Chitinophagaceae;unclassified;unclassified  
 424;Bacteria;Eumicrobia;Eumicrobia;Eumicrobiales;unclassified;unclassified;unclassified  
 124;Bacteria;Proteobacteria;Fickettsiales;Holosporaceae;unclassified;unclassified  
 1216;Bacteria;Proteobacteria;Deltaproteobacteria;Sintrophobacteriales;Sintrophobacteraceae;unclassified;unclassified  
 1228;Bacteria;Proteobacteria;Alphaproteobacteria;Rhodospirillales;Rhodospirillaceae;Magnetospirillum;Magnetospirillum\_sp.  
 20;Bacteria;Actinobacteria;Solibacteres;Solibacteraceae;Candidatus\_Solibacter;unclassified  
 204;Bacteria;Proteobacteria;Sphingobacteria;Sphingobacteriales;Chitinophagaceae;unclassified;unclassified  
 550;Bacteria;Proteobacteria;Alphaproteobacteria;Rhodospirillales;Rhodospirillaceae;Magnetospirillum;Magnetospirillum\_sp.  
 569;Bacteria;Firmicutes;Clostridia;Clostridiales;Lachnospiraceae;unclassified;unclassified  
 176;Bacteria;Proteobacteria;Deltaproteobacteria;Sintrophobacteriales;Desulfobacca;unclassified  
 910;Bacteria;Proteobacteria;Deltaproteobacteria;Sintrophobacteriales;unclassified;unclassified;unclassified  
 911;Bacteria;Bacteroidetes;Sphingobacteria;Sphingobacteriales;Chitinophagaceae;unclassified;unclassified  
 240;Bacteria;Actinobacteria;Actinomycetales;Actinomycetales;Chitinophagaceae;unclassified;unclassified  
 398;Bacteria;Bacteroidetes;Bacteroidia;Bacteroidales;Rikenellaceae;unclassified;unclassified  
 463;Bacteria;Proteobacteria;Betaproteobacteria;Burkholderiales;Oxalobacteraceae;Janthinobacterium;Janthinobacterium\_lividum  
 692;Bacteria;Firmicutes;Bacilli;Gemellales;Gemellaceae;Gemella;Gemella\_sanguinis  
 1227;Bacteria;Proteobacteria;Gammaproteobacteria;Enterobacteriales;Enterobacteriaceae;unclassified;unclassified  
 980;Bacteria;Firmicutes;Clostridia;Clostridiales;Fluminococcaceae;unclassified;unclassified  
 1138;Bacteria;Proteobacteria;Betaproteobacteria;Burkholderiales;Burkholderiaceae;Cupriavidus;unclassified  
 127;Bacteria;Proteobacteria;Gammaproteobacteria;Enterobacteriales;Enterobacteriaceae;unclassified;unclassified  
 278;Bacteria;Firmicutes;Clostridia;Clostridiales;unclassified;unclassified;unclassified  
 376;Bacteria;Bacteroidetes;Bacteroidia;Bacteroidales;Prevotellaceae;Prevotella;unclassified  
 454;Bacteria;Actinobacteria;Actinobacteria;Actinomycetales;Corynebacteriaceae;Corynebacterium;unclassified  
 56;Bacteria;Firmicutes;Clostridia;Clostridiales;Lachnospiraceae;unclassified;unclassified  
 701;Bacteria;Firmicutes;Bacilli;Lactobacillales;Streptococcaceae;Streptococcus;unclassified  
 915;Bacteria;Actinobacteria;Actinobacteria;Actinomycetales;unclassified;unclassified;unclassified  
 916;Bacteria;Actinobacteria;Actinobacteria;Actinomycetales;Corynebacteriaceae;Corynebacterium;unclassified  
 961;Bacteria;Actinobacteria;Actinobacteria;Actinomycetales;Corynebacteriaceae;Corynebacterium;unclassified  
 1052;Bacteria;Actinobacteria;Actinobacteria;Actinomycetales;Corynebacteriaceae;Corynebacterium;unclassified  
 1065;Bacteria;Bacteroidetes;Bacteroidia;Bacteroidales;Prevotellaceae;Prevotella;unclassified  
 1101;Bacteria;Actinobacteria;Actinobacteria;Actinomycetales;Corynebacteriaceae;Corynebacterium;unclassified  
 231;Bacteria;Actinobacteria;Actinobacteria;Actinomycetales;Actinomycetales;Molibuncus;Molibuncus\_curtisii  
 279;Bacteria;Firmicutes;Clostridia;Clostridiales;Lachnospiraceae;unclassified;unclassified  
 481;Bacteria;Firmicutes;Clostridia;Clostridiales;unclassified;unclassified;unclassified  
 559;Bacteria;Firmicutes;Clostridia;Clostridiales;Lachnospiraceae;unclassified;unclassified  
 599;Bacteria;Bacteroidetes;Bacteroidia;Bacteroidales;Rikenellaceae;unclassified;unclassified  
 895;Bacteria;Proteobacteria;Deltaproteobacteria;Desulfobacteriales;Nitrospiraceae;unclassified;unclassified  
 1040;Bacteria;Actinobacteria;Actinobacteria;Actinomycetales;Corynebacteriaceae;Corynebacterium;unclassified  
 1051;Bacteria;Actinobacteria;Actinobacteria;Actinomycetales;Corynebacteriaceae;Corynebacterium;unclassified  
 1060;Bacteria;Firmicutes;Bacilli;Bacillales;Staphylococcaceae;Staphylococcus;Staphylococcus\_epidermidis  
 110;Bacteria;Actinobacteria;Actinobacteria;Actinomycetales;unclassified;unclassified;unclassified  
 1180;Bacteria;Firmicutes;Clostridia;Clostridiales;Lachnospiraceae;unclassified;unclassified  
 216;Bacteria;Firmicutes;Clostridia;Clostridiales;Clostridiales\_Family\_XI\_Incertae\_Sedis;Peptoniphilus;Peptoniphilus\_asaccharotylus  
 603;Bacteria;Bacteroidetes;Bacteroidia;Bacteroidales;Rikenellaceae;unclassified;unclassified  
 693;Bacteria;Proteobacteria;Gammaproteobacteria;Xanthomonadales;Sinobacteraceae;Nevskia;unclassified  
 693;Bacteria;Firmicutes;Clostridia;Clostridiales;Lachnospiraceae;unclassified;unclassified  
 1037;Bacteria;Firmicutes;Clostridia;Clostridiales;unclassified;unclassified;unclassified  
 105;Bacteria;Actinobacteria;Actinobacteria;Actinomycetales;Corynebacteriaceae;Corynebacterium;unclassified  
 1145;Bacteria;Planctomycetes;Planctomycetales;Planctomycetales;Planctomycetales;unclassified;unclassified  
 633;Bacteria;Firmicutes;Bacilli;Lactobacillales;Streptococcaceae;Streptococcus;unclassified  
 896;Bacteria;Firmicutes;Clostridia;Clostridiales;unclassified;unclassified;unclassified  
 612;Bacteria;Firmicutes;Bacilli;Lactobacillales;unclassified;unclassified;unclassified

75;Bacteria;Firmicutes;Clostridia;Clostridiales;Lachnospiraceae;unclassified;unclassified  
 499;Bacteria;Firmicutes;Clostridia;Clostridiales;Clostridiales\_Family\_XI\_Incertae\_Sedis;Finegoldia;Finegoldia\_magna  
 1092;Bacteria;Proteobacteria;Alphaproteobacteria;Caulobacteriales;Caulobacteraceae;unclassified;unclassified  
 149;Bacteria;Firmicutes;Clostridia;Clostridiales;unclassified;unclassified;unclassified  
 556;Bacteria;Firmicutes;Clostridia;Clostridiales;Ruminococcaceae;unclassified;unclassified  
 885;Bacteria;Proteobacteria;unclassified;unclassified;unclassified;unclassified;unclassified  
 88;Bacteria;Firmicutes;Clostridia;Clostridiales;Lachnospiraceae;unclassified;unclassified  
 377;Bacteria;Bacteroidetes;Bacteroidia;Bacteroidales;Prevotellaceae;Prevotella;unclassified  
 557;Bacteria;Firmicutes;Clostridia;Clostridiales;unclassified;unclassified;unclassified  
 646;Bacteria;Actinobacteria;Actinobacteria;Actinomycetales;Corynebacteriaceae;Corynebacterium;unclassified  
 776;Bacteria;Firmicutes;Clostridia;Clostridiales;Lachnospiraceae;unclassified;unclassified  
 895;Bacteria;Proteobacteria;Deltaproteobacteria;Desulfobacteriales;Nitrospiraceae;unclassified;unclassified  
 185;Bacteria;Proteobacteria;Epsilonproteobacteria;Campylobacteriales;Campylobacteraceae;Campylobacter;unclassified  
 273;Bacteria;Firmicutes;Clostridia;Clostridiales;Lachnospiraceae;unclassified;unclassified  
 791;Bacteria;Firmicutes;Clostridia;Clostridiales;Lachnospiraceae;unclassified;unclassified  
 1002;Bacteria;Firmicutes;Clostridia;Clostridiales;Clostridiales\_Family\_XI\_Incertae\_Sedis;Anaerococcus;unclassified  
 1104;Bacteria;Actinobacteria;Actinobacteria;unclassified;unclassified;unclassified  
 279;Bacteria;Firmicutes;Clostridia;Clostridiales;Lachnospiraceae;unclassified;unclassified  
 560;Bacteria;Firmicutes;Clostridia;Clostridiales;Lachnospiraceae;unclassified;unclassified  
 899;Bacteria;Firmicutes;Clostridia;Clostridiales;Clostridiales\_Family\_XI\_Incertae\_Sedis;Finegoldia;unclassified  
 981;Bacteria;Actinobacteria;Actinobacteria;Actinomycetales;Actinomycetales;unclassified;unclassified  
 36;Bacteria;Firmicutes;Bacilli;Lactobacillales;Enterococcaceae;Enterococcus;Enterococcus\_faecalis  
 425;Bacteria;Proteobacteria;Gammaproteobacteria;Pseudomonadales;Pseudomonadaceae;Pseudomonas;unclassified  
 1200;Bacteria;Proteobacteria;Gammaproteobacteria;Enterobacteriales;Enterobacteriaceae;unclassified;unclassified  
 173;Bacteria;Firmicutes;Bacilli;Lactobacillales;Enterococcaceae;Enterococcus;unclassified  
 340;Bacteria;Proteobacteria;Gammaproteobacteria;unclassified;unclassified;unclassified;unclassified  
 612;Bacteria;Proteobacteria;Alphaproteobacteria;Rhizobiales;Rhizobiaceae;Rhizobium;unclassified  
 656;Bacteria;Proteobacteria;Gammaproteobacteria;Pseudomonadales;Pseudomonadaceae;Pseudomonas;unclassified  
 798;Bacteria;Firmicutes;Clostridia;Clostridiales;Lachnospiraceae;unclassified;unclassified  
 1089;Bacteria;Proteobacteria;Alphaproteobacteria;Sphingomonadales;Sphingomonadaceae;Sphingomonas;unclassified  
 262;Bacteria;Firmicutes;Clostridia;Clostridiales;Lachnospiraceae;unclassified;unclassified  
 341;Bacteria;Firmicutes;Clostridia;Clostridiales;Lachnospiraceae;unclassified;unclassified  
 383;Bacteria;Proteobacteria;Alphaproteobacteria;Sphingomonadales;Sphingomonadaceae;Sphingomonas;unclassified  
 657;Bacteria;Proteobacteria;Gammaproteobacteria;Pseudomonadales;Pseudomonadaceae;Pseudomonas;unclassified  
 1195;Bacteria;Proteobacteria;Gammaproteobacteria;Pseudomonadales;Pseudomonadaceae;Pseudomonas;unclassified  
 382;Bacteria;Proteobacteria;Alphaproteobacteria;Sphingomonadales;Sphingomonadaceae;Sphingomonas;unclassified  
 630;Bacteria;Proteobacteria;Alphaproteobacteria;Sphingomonadales;Sphingomonadaceae;Sphingobium;unclassified  
 415;Bacteria;Proteobacteria;Gammaproteobacteria;Pseudomonadales;Pseudomonadaceae;Pseudomonas;Pseudomonas\_cedrina
