# Supplementary material for: Preparing for the crewed Mars journey: microbiota dynamics in the confined Mars500 habitat during simulated Mars flight and landing
Source: PubMed Central journal article supplement (PMC5627443; doi:10.1186/s40168-017-0345-8), 2017-10-04

# beta diversity distances to the medical module (EU-100)

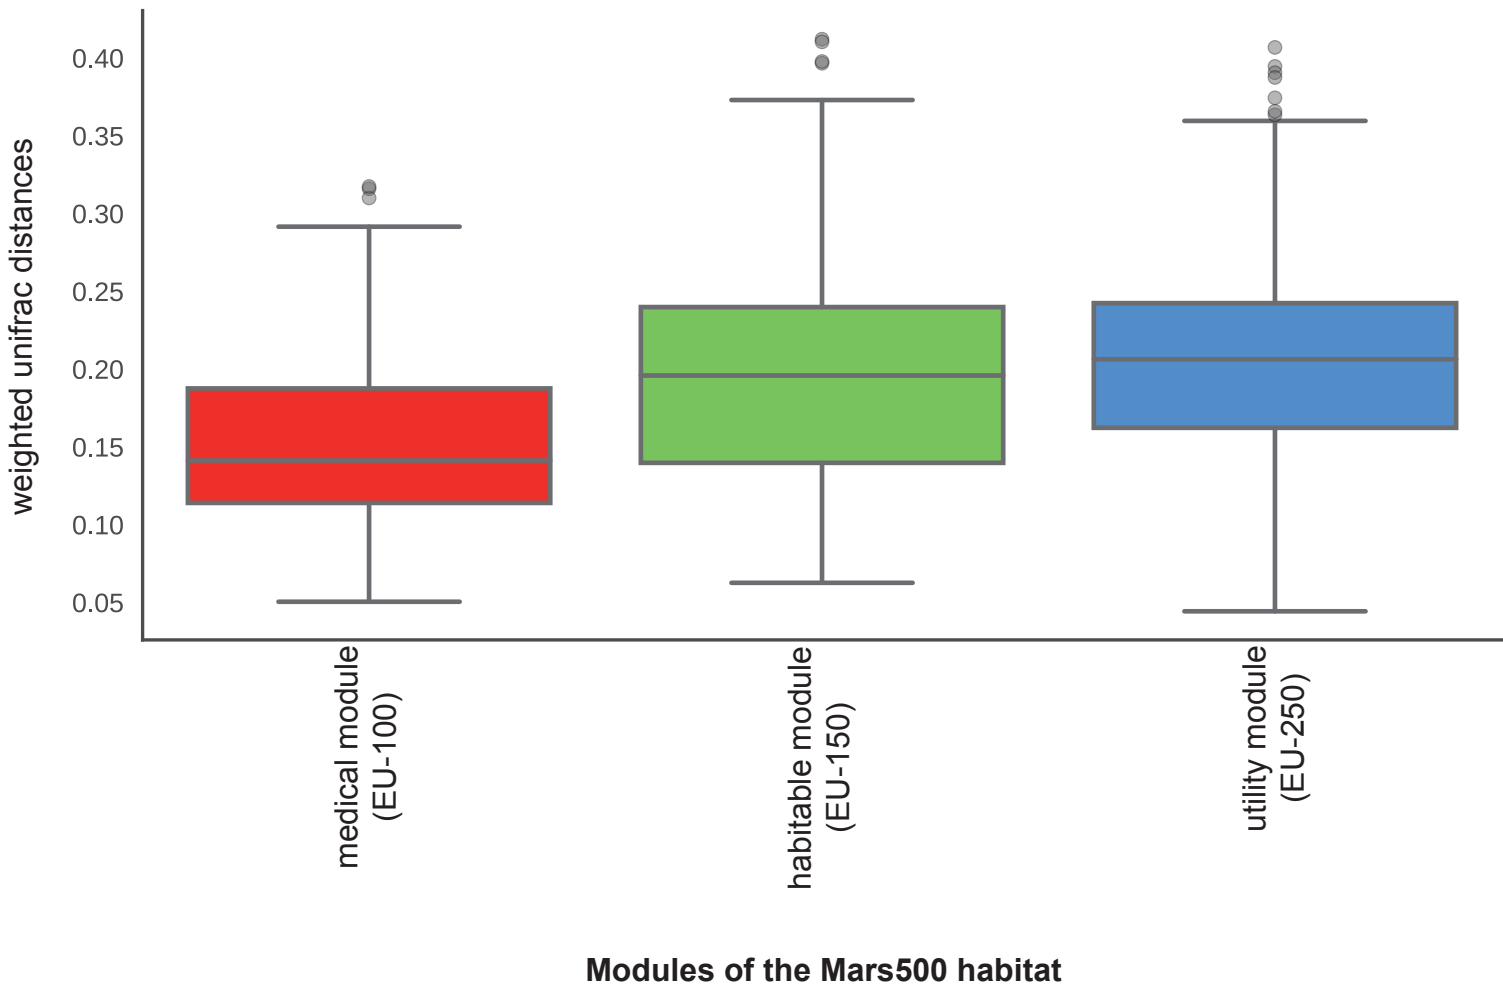

Supplement: 40168_2017_345_MOESM13_ESM.pdf [file 40168_2017_345_MOESM13_ESM.pdf]
